# Supplementary material for: Ras-ERK-ETS inhibition alleviates neuronal mitochondrial dysfunction by reprogramming mitochondrial retrograde signaling
Source: PLoS Genet. 2018 Jul 30;14(7):e1007567. doi: 10.1371/journal.pgen.1007567 (PMC6085068; doi:10.1371/journal.pgen.1007567)
Supplement: S2 Table — The outcome of the screen is in the Result column. Any lines that had a phenotype with MS1096-Gal4 alone were excluded from the screen, so the result reads ‘Excluded’. The confirmed column refers to confirmation of the result with an independent RNAi for the same gene, Y: confirmed, N: not confirmed, see S5 and S6 Tables for details. If the Confirmed column is blank, then an alternative RNAi was not available. (XLSX) [file pgen.1007567.s010.xlsx]

## Sheet: Sheet1
Gene name	Gene symbol	Flybase ID	CG #	VDRC ID	NIG ID/ Trip ID	Result	Confirmed
-	CG33170	FBgn0053170	33170	102433		Enhancer	N
Enhancer of bithorax	E(bx)	FBgn0000541	32346	24740		Enhancer	N
breathless	btl	FBgn0005592	32134	27106		Enhancer	N
-	CG31324	FBgn0051324	31324	107220		Enhancer	N
scribbled	scrib	FBgn0263289	31082	102821		Enhancer	N
pyrexia	pyx	FBgn0035113	17142	110130		Enhancer	N
dawdle	daw	FBgn0031461	16987	105309		Enhancer	N
Inositol 1,4,5-triphosphate kinase 2		FBgn0266375	15745	102730		Enhancer	N
gamma-glutamyl carboxylase	GC	FBgn0035245	13927	109613		Enhancer	N
Neuroligin 2	Nlg2	FBgn0031866	13772	107166		Enhancer	N
-	CG11658	FBgn0036196	11658	108611		Enhancer	N
twin of eyeless	toy	FBgn0019650	11186	110353		Enhancer	N
Disabled	Dab	FBgn0000414	9695	109646		Enhancer	N
-	CG9095	FBgn0030617	9095	104608		Enhancer	N
Imitation SWI	Iswi	FBgn0011604	8625	24505		Enhancer	N
Sodium/solute co-transporter-like 5A11	SLC5A11	FBgn0031998	8451	104177		Enhancer	N
-	Wdr62	FBgn0031374	7337	110764		Enhancer	N
taranis	tara	FBgn0040071	6889	107508		Enhancer	N
-	CG6847	FBgn0030884	6847	22451		Enhancer	N
plum	plum	FBgn0039431	6490	101135		Enhancer	N
MORF-related gene 15	MRG15	FBgn0027378	6363	110618		Enhancer	N
arrow	arr	FBgn0000119	5912		HMC03571	Enhancer	N
-	CG5466	FBgn0038815	5466	104522		Enhancer	N
-	CG5455	FBgn0039430	5455	104118		Enhancer	N
-	CG5059	FBgn0037007	5059	107493		Enhancer	N
GATAd	GATAd	FBgn0032223	5034	100389		Enhancer	N
elbow B	elB	FBgn0004858	4220	104620		Enhancer	N
spoonbill	spoon	FBgn0263987	3249	105107		Enhancer	N
Integrator 6	IntS6	FBgn0261383	3125	110612		Enhancer	N
late bloomer	lbm	FBgn0016032	2374	102739		Enhancer	N
-	CG2225	FBgn0032957	2225	102815		Enhancer	N
ATP-dependent chromatin assembly factor large subunit	Acf	FBgn0027620	1966	33447		Enhancer	N
-	CG8778	FBgn0033761	8778	105442		Enhancer	Opposite
branchless	bnl	FBgn0014135	4608	5732		Enhancer	Y
Dual-specificity tyrosine phosphorylation-regulated kinase 2	Dyrk2	FBgn0016930	4551	101376		Enhancer	Y
Heat shock gene 67Bc	Hsp67Bc	FBgn0001229	4190	103974		Enhancer	Y
Reticulon-like1	Rtnl1	FBgn0053113	33113	110545		Enhancer	Y
X11Lbeta	X11Lbeta	FBgn0052677	32677	14872		Enhancer	Y
defective proboscis extension response 8	dpr8	FBgn0052600	32600	106791		Enhancer	Y
Keren	Krn	FBgn0052179	32179	6119		Enhancer	Y
-	CG18549	FBgn0038053	18549	107272		Enhancer	Y
Adenylate kinase 1	Adk1	FBgn0022709	17146	104475		Enhancer	Y
sloppy paired 1	slp1	FBgn0003430	16738	107562		Enhancer	Y
5-hydroxytryptamine (serotonin) receptor 1A	5-HT1A	FBgn0004168	16720		16720R-1	Enhancer	Y
Capability receptor	CapaR	FBgn0037100	14575	13384		Enhancer	Y
distal antenna-related	danr	FBgn0039283	13651	11514		Enhancer	Y
Forkhead box K	FoxK	FBgn0036134	11799	110151		Enhancer	Y
Phosphoglucose isomerase	Pgi	FBgn0003074	8251	103616		Enhancer	Y
Wnt oncogene analog 5	Wnt5	FBgn0010194	6407	101621		Enhancer	Y
-	CG6330	FBgn0039464	6330	104776		Enhancer	Y
-	CG5599	FBgn0030612	5599	106456		Enhancer	Y
-	CG4004	FBgn0030418	4004	104537		Enhancer	Y
phtf	phtf	FBgn0028579	3268	103578		Enhancer	Y
Phosphoglycerate kinase	Pgk	FBgn0250906	3127	110081		Enhancer	Y
Amun	Amun	FBgn0030328	2446	104808		Enhancer	Y
lethal (1) G0289	l(1)G0289	FBgn0028331	2221	107283		Enhancer	Y
-	CG2124	FBgn0030217	2124	106235		Enhancer	Y
tropomodulin	tmod	FBgn0082582	1539	108389		Enhancer	Y
-	CG18809	FBgn0042132	18809	20702		Enhancer
-	ZAP3	FBgn0052685	32685	22781		Enhancer
-	CG32521	FBgn0052521	32521	110002		Enhancer
stathmin	stai	FBgn0266521	31641	32370		Enhancer
-	CG31436	FBgn0051436	31436	107606		Enhancer
-	CG17734	FBgn0037890	17734	102605		Enhancer
Lipase 2	Lip2	FBgn0024740	17116	102033		Enhancer
roquin	roq	FBgn0036621	16807	23843		Enhancer
defective proboscis extension response 6	dpr6	FBgn0040823	14162	103521		Enhancer
caskin	ckn	FBgn0033987	12424	25222		Enhancer
-	DOR	FBgn0035542	11347	105330		Enhancer
Cytochrome P450-6a9	Cyp6a9	FBgn0013771	10246	100143		Enhancer
-	CG6154	FBgn0039420	6154	23008		Enhancer
-	CG44774	FBgn0266000	4068	103486		Enhancer
encore	enc	FBgn0004875	10847	101500		Excluded
-	CG2970	FBgn0034936	2970	110562		Excluded
dead end	dnd	FBgn0038916	6560	104311		Excluded
eIF5B	eIF5B	FBgn0026259	10840	109782		Excluded
Heterogeneous nuclear ribonucleoprotein at 27C	Hrb27C	FBgn0004838	10377	101555		Excluded
Zinc-finger protein	Zif	FBgn0037446	10267	100204		Excluded
-	CG6227	FBgn0030631	6227	110778		Excluded
Rab11	Rab11	FBgn0015790	5771	108382		Excluded
bonus	bon	FBgn0023097	5206	101737		Excluded
Rab5	Rab5	FBgn0014010	3664	103945		Excluded
S-adenosylmethionine Synthetase	Sam-S	FBgn0005278	2674	103143		Excluded
Vacuolar protein sorting 15	Vps15	FBgn0260935	9746	110706		Excluded
mitochondrial ribosomal protein S11	mRpS11	FBgn0038474	5184	106653		Excluded
grainy head	grh	FBgn0259211	42311	101428		Excluded
grainy head	grh	FBgn0259211	42311	106879		Excluded
Nipped-A	Nipped-A	FBgn0053554	33554	44781		Excluded
Nipped-A	Nipped-A	FBgn0053554	33554	40789		Excluded
Nipped-A	Nipped-A	FBgn0053554	33554	40790		Excluded
Nipped-A	Nipped-A	FBgn0053554	33554	52436		Excluded
Nipped-A	Nipped-A	FBgn0053554	33554	52487		Excluded
nab	nab	FBgn0259986	33545	104811		Excluded
Hormone receptor 3	Hr3	FBgn0000448	33183	106837		Excluded
-	CG33181	FBgn0053181	33181	103142		Excluded
-	CG33129	FBgn0053129	33129	107365		Excluded
-	CG32813	FBgn0052813	32813	101839		Excluded
-	CG32767	FBgn0052767	32767	42336		Excluded
lethal (1) G0320	l(1)G0320	FBgn0028327	32701	110344		Excluded
-	CG32683	FBgn0052683	32683	104029		Excluded
Autophagy-related 8a	Atg8a	FBgn0052672	32672	109654		Excluded
Death-associated protein kinase related	Drak	FBgn0052666	32666	107263		Excluded
-	CG32647	FBgn0052647	32647	104082		Excluded
lethal (1) G0007	l(1)G0007	FBgn0026713	32604	103940		Excluded
-	CG32549	FBgn0052549	32549	103916		Excluded
bves	bves	FBgn0031150	32513	104719		Excluded
-	CG32264	FBgn0052264	32264	101503		Excluded
Ecdysone-induced protein 74EF	Eip74EF	FBgn0000567	32180	105301		Excluded
Formin-like	Frl	FBgn0267795	32138	110438		Excluded
RNA-binding Fox protein 1	Rbfox1	FBgn0052062	32062	110518		Excluded
Centaurin gamma 1A	CenG1A	FBgn0028509	31811	100123		Excluded
virus-induced RNA 1	vir-1	FBgn0043841	31764	102534		Excluded
Cnot 4 homologue	Cnot4	FBgn0051716	31716	110472		Excluded
Trissin receptor	TrissinR	FBgn0085410	31645	42759		Excluded
-	Unc-115a	FBgn0051352	31352	106405		Excluded
curled	cu	FBgn0261808	31299	109759		Excluded
couch potato	cpo	FBgn0263995	31243	14385		Excluded
Lipophorin receptor 2	LpR2	FBgn0051092	31092	107597		Excluded
hephaestus	heph	FBgn0011224	31000	110749		Excluded
boca	boca	FBgn0004132	30498	108406		Excluded
Prosap	Prosap	FBgn0040752	30483	103592		Excluded
-	CG30340	FBgn0050340	30340	7387		Excluded
Tetraspanin 42Ea	Tsp42Ea	FBgn0029508	18817	109172		Excluded
moira	mor	FBgn0002783	18740	110712		Excluded
Furin 2	Fur2	FBgn0004598	18734	101242		Excluded
-	CG18596	FBgn0038953	18596	108183		Excluded
Insulin-like receptor	InR	FBgn0283499	18402	991		Excluded
Insulin-like receptor	InR	FBgn0283499	18402	992		Excluded
TATA box binding protein-related factor 2	Trf2	FBgn0261793	18009	101318		Excluded
Syncrip	Syp	FBgn0038826	17838	110542		Excluded
-	CG17816	FBgn0037525	17816	103210		Excluded
G protein alpha q subunit	Galphaq	FBgn0004435	17759	19088		Excluded
frizzled	fz	FBgn0001085	17697	105493		Excluded
Enolase	Eno	FBgn0000579	17654	110090		Excluded
-	CG17544	FBgn0032775	17544	110169		Excluded
derailed	drl	FBgn0015380	17348	100039		Excluded
levy	levy	FBgn0034877	17280	101523		Excluded
grapes	grp	FBgn0261278	17161	110076		Excluded
homothorax	hth	FBgn0001235	17117		17117R-2	Excluded
homothorax	hth	FBgn0001235	17117	12763		Excluded
homothorax	hth	FBgn0001235	17117	100630		Excluded
-	CG32295	FBgn0260480	16757	105888		Excluded
zipper	zip	FBgn0265434	15792	7819		Excluded
-	CG15771	FBgn0029801	15771	106331		Excluded
-	CG15445	FBgn0031161	15445	106271		Excluded
Casein kinase II beta subunit	CkIIbeta	FBgn0000259	15224	106845		Excluded
Pak3	Pak3	FBgn0044826	14895	107260		Excluded
-	CG14767	FBgn0040777	14767	105373		Excluded
Tachykinin	Tk	FBgn0037976	14734	103662		Excluded
Cytochrome c oxidase subunit 5A	COX5A	FBgn0019624	14724	109070		Excluded
-	CG14722	FBgn0037943	14722	105127		Excluded
Bromodomain containing 8	Brd8	FBgn0039654	14514	104879		Excluded
Glutamate receptor binding protein	Grip	FBgn0029830	14447	103551		Excluded
-	CG14438	FBgn0029899	14438	100109		Excluded
-	CG14322	FBgn0038532	14322	105876		Excluded
-	CG14291	FBgn0038660	14291	107384		Excluded
Cytochrome c oxidase subunit 6B	COX6B	FBgn0031066	14235	26848		Excluded
domeless	dome	FBgn0043903	14226	19717		Excluded
domeless	dome	FBgn0043903	14226	106071		Excluded
-	CG14215	FBgn0031052	14215	103547		Excluded
vrille	vri	FBgn0016076	14029	110751		Excluded
-	CG13917	FBgn0035237	13917	32082		Excluded
-	CG13784	FBgn0031897	13784	110080		Excluded
MRG/MORF4L binding protein	MrgBP	FBgn0033341	13746	41402		Excluded
MRG/MORF4L binding protein	MrgBP	FBgn0033341	13746	41403		Excluded
pyramus	pyr	FBgn0033649	13194	36524		Excluded
-	CG12935	FBgn0033547	12935	100154		Excluded
Esa1-associated factor 6	Eaf6	FBgn0035624	12756	101457		Excluded
olf413	olf413	FBgn0037153	12673	104097		Excluded
Mothers against dpp	Mad	FBgn0011648	12399	12635		Excluded
Lachesin	Lac	FBgn0010238	12369	107450		Excluded
glial cells missing	gcm	FBgn0014179	12245	2961		Excluded
glial cells missing	gcm	FBgn0014179	12245	2962		Excluded
glial cells missing	gcm	FBgn0014179	12245	110539		Excluded
licorne	lic	FBgn0261524	12244	106822		Excluded
lethal (1) G0156	l(1)G0156	FBgn0027291	12233	106091		Excluded
Dorsal switch protein 1	Dsp1	FBgn0278608	12223	101327		Excluded
baiser	bai	FBgn0045866	11785	100612		Excluded
Neural conserved at 73EF	Nc73EF	FBgn0010352	11661	107713		Excluded
Ribosomal protein L6	RpL6	FBgn0039857	11522	107302		Excluded
-	CG11486	FBgn0035397	11486	106497		Excluded
-	CG11241	FBgn0037186	11241	110651		Excluded
lethal (3) 04053	l(3)04053	FBgn0010830	11238	31465		Excluded
DNA methyltransferase 1 associated protein 1	DMAP1	FBgn0034537	11132	103734		Excluded
Mesoderm-expressed 2	Mes2	FBgn0037207	11100	109111		Excluded
Activin-beta	Actbeta	FBgn0024913	11062		11062R-1	Excluded
-	CG10949	FBgn0032858	10949	107251		Excluded
-	CG10903	FBgn0037543	10903	109610		Excluded
-	CG10898	FBgn0037911	10898	103422		Excluded
lethal (2) 37Cc	l(2)37Cc	FBgn0002031	10691	12360		Excluded
vein	vn	FBgn0003984	10491	50358		Excluded
-	CG10479	FBgn0035656	10479	106226		Excluded
p21-activated kinase	Pak	FBgn0267698	10295	108937		Excluded
Rm62	Rm62	FBgn0003261	10279	110102		Excluded
Topoisomerase 2	Top2	FBgn0003732	10223	30625		Excluded
Vacuolar protein sorting 8	Vps8	FBgn0035704	10144	105952		Excluded
-	CG10137	FBgn0032800	10137	100007		Excluded
Epidermal growth factor receptor	Egfr	FBgn0003731	10079	43267		Excluded
Epidermal growth factor receptor	Egfr	FBgn0003731	10079	43268		Excluded
Allatostatin A receptor 2	AstA-R2	FBgn0039595	10001	1326		Excluded
Allatostatin A receptor 2	AstA-R2	FBgn0039595	10001	1327		Excluded
Partner of paired	Ppa	FBgn0020257	9952	100298		Excluded
transforming acidic coiled-coil protein	tacc	FBgn0026620	9765	101439		Excluded
Neprilysin 2	Nep2	FBgn0027570	9761	102584		Excluded
reptin	rept	FBgn0040075	9750		9750R-1	Excluded
reptin	rept	FBgn0040075	9750		HMS00410	Excluded
Tumor susceptibility gene 101	TSG101	FBgn0036666	9712	23944		Excluded
domino	dom	FBgn0020306	9696	7787		Excluded
-	CG9674	FBgn0036663	9674	100170		Excluded
Sex comb on midleg	Scm	FBgn0003334	9495	109597		Excluded
-	CG9399	FBgn0037715	9399	101455		Excluded
Acetyl Coenzyme A synthase	AcCoAS	FBgn0012034	9390	100281		Excluded
skywalker	sky	FBgn0032901	9339	108736		Excluded
varicose	vari	FBgn0250785	9326	104548		Excluded
-	CG9257	FBgn0032916	9257	103425		Excluded
Lipid storage droplet-2	Lsd-2	FBgn0030608	9057	40734		Excluded
tay bridge	tay	FBgn0260938	9056	107891		Excluded
Glycerol 3 phosphate dehydrogenase	Gpdh	FBgn0001128	9042	105359		Excluded
Ral guanine nucleotide dissociation stimulator-like ortholog (M. musculus)	Rgl	FBgn0026376	8865	106468		Excluded
Sin3A	Sin3A	FBgn0022764	8815	105852		Excluded
wallenda	wnd	FBgn0036896	8789	103410		Excluded
-	CG8728	FBgn0033235	8728	110093		Excluded
trithorax	trx	FBgn0003862	8651	108122		Excluded
-	CG8602	FBgn0035763	8602	101575		Excluded
scalloped	sd	FBgn0003345	8544	101497		Excluded
combgap	cg	FBgn0000289	8367	102054		Excluded
sulfateless	sfl	FBgn0020251	8339	5070		Excluded
-	CG8272	FBgn0033337	8272	106686		Excluded
Glycerophosphate oxidase-1	Gpo-1	FBgn0022160	8256	110608		Excluded
PDGF- and VEGF-receptor related	Pvr	FBgn0032006	8222	105353		Excluded
Methyl-CpG binding domain protein-like	MBD-like	FBgn0027950	8208	107151		Excluded
Ecdysone-induced protein 75B	Eip75B	FBgn0000568	8127	108399		Excluded
Mi-2	Mi-2	FBgn0262519	8103	107204		Excluded
Vacuolar H[+] ATPase 44kD subunit	Vha44	FBgn0262511	8048	101527		Excluded
-	CG8034	FBgn0031011	8034		HMS00331	Excluded
Vacuolar H[+] ATPase AC45 accessory subunit	VhaAC45	FBgn0262515	8029	101726		Excluded
-	CG7991	FBgn0035260	7991	109922		Excluded
-	CG7971	FBgn0035253	7971	101384		Excluded
-	CG7966	FBgn0038115	7966		7966R-1	Excluded
similar	sima	FBgn0266411	7951	106187		Excluded
Actin-related protein 5	Arp5	FBgn0038576	7940	110235		Excluded
PNGase-like	Pngl	FBgn0033050	7865	103607		Excluded
stripe	sr	FBgn0003499	7847	105282		Excluded
Ribosomal protein S8	RpS8	FBgn0039713	7808	106835		Excluded
Enhancer of Polycomb	E(Pc)	FBgn0000581	7776	35268		Excluded
schnurri	shn	FBgn0003396	7734	105643		Excluded
Mekk1	Mekk1	FBgn0024329	7717	110339		Excluded
-	CG7694	FBgn0038627	7694	108995		Excluded
charybde	chrb	FBgn0036165	7533	105757		Excluded
-	CG7488	FBgn0038106	7488	106677		Excluded
Histone deacetylase 1	HDAC1	FBgn0015805	7471	30599		Excluded
Histone deacetylase 1	HDAC1	FBgn0015805	7471	30600		Excluded
Histone deacetylase 1	HDAC1	FBgn0015805	7471	46929		Excluded
Histone deacetylase 1	HDAC1	FBgn0015805	7471	46930		Excluded
osa	osa	FBgn0261885	7467	7810		Excluded
Ribosomal protein L22	RpL22	FBgn0015288	7434	104506		Excluded
effete	eff	FBgn0011217	7425		7425R-2	Excluded
Retinoblastoma-family protein	Rbf	FBgn0015799	7413	10696		Excluded
Fatty acid (long chain) transport protein	Fatp	FBgn0267828	7400	100124		Excluded
Lipase 1	Lip1	FBgn0023496	7279	18107		Excluded
Glycogen phosphorylase	GlyP	FBgn0004507	7254	109596		Excluded
-	CG7222	FBgn0033551	7222	34377		Excluded
Cytochrome c oxidase subunit 8	COX8	FBgn0263911	7181	104047		Excluded
scully	scu	FBgn0021765	7113	110802		Excluded
happyhour	hppy	FBgn0263395	7097	103580		Excluded
Brahma associated protein 111kD	Bap111	FBgn0030093	7055	104361		Excluded
gilgamesh	gish	FBgn0250823	6963	106826		Excluded
Oscillin	Oscillin	FBgn0031717	6957	106685		Excluded
lethal (3) neo38	l(3)neo38	FBgn0265276	6930	107927		Excluded
MYPT-75D	MYPT-75D	FBgn0036801	6896	109909		Excluded
tolkin	tok	FBgn0004885	6863	110432		Excluded
-	CG6770	FBgn0032400	6770	102402		Excluded
Cysteine proteinase-1	Cp1	FBgn0013770	6692	110619		Excluded
klingon	klg	FBgn0017590	6669	102502		Excluded
klingon	klg	FBgn0017590	6669	108818		Excluded
dorsal	dl	FBgn0260632	6667	10549		Excluded
Fasciclin 1	Fas1	FBgn0262742	6588	101779		Excluded
Brahma associated protein 55kD	Bap55	FBgn0025716	6546	24703		Excluded
Brahma associated protein 55kD	Bap55	FBgn0025716	6546	24704		Excluded
Ribosomal protein L18A	RpL18A	FBgn0010409	6510	107278		Excluded
-	CG6422	FBgn0039261	6422	106251		Excluded
UDP-N-acetyl-alpha-D-galactosamine:polypeptide N-acetylgalactosaminyltransferase 2	GalNAc-T2	FBgn0030930	6394	105160		Excluded
female lethal d	fl(2)d	FBgn0000662	6315	103361		Excluded
twins	tws	FBgn0004889	6235	104167		Excluded
Surfeit 4	Surf4	FBgn0019925	6202	108944		Excluded
Tat interactive protein 60kDa	Tip60	FBgn0026080	6121	110617		Excluded
Lipase 4	Lip4	FBgn0032264	6113	31021		Excluded
sarah	sra	FBgn0086370	6072	107573		Excluded
Aldolase	Ald	FBgn0000064	6058	101339		Excluded
-	CG6040	FBgn0038679	6040	106606		Excluded
Huntingtin-interacting protein 14	Hip14	FBgn0259824	6017	101736		Excluded
brahma	brm	FBgn0000212	5942	37720		Excluded
brahma	brm	FBgn0000212	5942	37721		Excluded
Ribosomal protein S2	RpS2	FBgn0004867	5920	100308		Excluded
ETHR	ETHR	FBgn0038874	5911	42716		Excluded
Dichaete	D	FBgn0000411	5893	2940		Excluded
Dichaete	D	FBgn0000411	5893	107194		Excluded
-	CG5694	FBgn0032197	5694	102156		Excluded
-	CG5555	FBgn0038686	5555	110162		Excluded
scrawny	scny	FBgn0260936	5505	105989		Excluded
Ribosomal protein L4	RpL4	FBgn0003279	5502	101346		Excluded
Histone H2A variant	His2Av	FBgn0001197	5499	110598		Excluded
Dodeca-satellite-binding protein 1	Dp1	FBgn0027835	5170	106047		Excluded
-	CG5003	FBgn0039554	5003	26679		Excluded
-	CG5001	FBgn0031322	5001	101532		Excluded
mini spindles	msps	FBgn0027948	5000	21982		Excluded
spalt-related	salr	FBgn0000287	4881	28387		Excluded
hedgehog	hh	FBgn0004644	4637	1402		Excluded
Nucleosome remodeling factor - 38kD	Nurf-38	FBgn0016687	4634	103776		Excluded
YL-1	YL-1	FBgn0032321	4621	107951		Excluded
-	CG4612	FBgn0035016	4612	52497		Excluded
branchless	bnl	FBgn0014135	4608	5730		Excluded
Phospholipase C at 21C	Plc21C	FBgn0004611	4574	108395		Excluded
-	CG4502	FBgn0031896	4502	34858		Excluded
no ocelli	noc	FBgn0005771	4491	108422		Excluded
enhanced adult sensory threshold	east	FBgn0261954	4399	104091		Excluded
Mitochondrial trifunctional protein alpha subunit	Mtpalpha	FBgn0028479	4389	100021		Excluded
Star	S	FBgn0003310	4385	109838		Excluded
Glutathione S transferase D3	GstD3	FBgn0010039	4381	106287		Excluded
raptor	raptor	FBgn0029840	4320	13112		Excluded
Multiple inositol polyphosphate phosphatase 2	Mipp2	FBgn0026060	4317	108018		Excluded
Brahma associated protein 60kD	Bap60	FBgn0025463	4303	103634		Excluded
Adaptor Protein complex 2, alpha subunit	AP-2alpha	FBgn0264855	4260	15565		Excluded
Signal-transducer and activator of transcription protein at 92E	Stat92E	FBgn0016917	4257	43866		Excluded
Chromatin assembly factor 1, p55 subunit	Caf1-55	FBgn0263979	4236	105838		Excluded
Actin 5C	Act5C	FBgn0000042	4027	101438		Excluded
pontin	pont	FBgn0040078	4003	105408		Excluded
kraken	kraken	FBgn0020545	3943	105604		Excluded
Chip	Chi	FBgn0013764	3924	107314		Excluded
knockdown	kdn	FBgn0261955	3861	107642		Excluded
Secreted decoy of InR	Sdr	FBgn0038279	3837	105549		Excluded
-	CG3812	FBgn0030421	3812	109657		Excluded
Ribosomal protein S24	RpS24	FBgn0261596	3751	104676		Excluded
wings apart-like	wapl	FBgn0004655	3707	34686		Excluded
bifid	bi	FBgn0000179	3578	100598		Excluded
visceral mesodermal armadillo-repeats	vimar	FBgn0022960	3572	105618		Excluded
cappuccino	capu	FBgn0000256	3399		HMS00712	Excluded
Brahma associated protein 170kD	Bap170	FBgn0042085	3274	34582		Excluded
-	CG3104	FBgn0031473	3104	101519		Excluded
Hsc/Hsp70-interacting protein related	HIP-R	FBgn0029676	2947	43724		Excluded
Ras-like protein A	Rala	FBgn0015286	2849	105296		Excluded
G protein alpha s subunit	Galphas	FBgn0001123	2835	24958		Excluded
G protein alpha s subunit	Galphas	FBgn0001123	2835		2835R-1	Excluded
u-shaped	ush	FBgn0003963	2762	104102		Excluded
-	CG2747	FBgn0037541	2747	33566		Excluded
Syntaxin 4	Syx4	FBgn0024980	2715	102466		Excluded
shaggy	sgg	FBgn0003371	2621	101538		Excluded
corto	corto	FBgn0010313	2530	3778		Excluded
pipsqueak	psq	FBgn0263102	2368	106404		Excluded
-	CG2182	FBgn0037360	2182	109653		Excluded
-	CG2162	FBgn0035388	2162	33493		Excluded
castor	cas	FBgn0004878	2102	100305		Excluded
Ten-Eleven Translocation (TET) family protein	Tet	FBgn0263392	2083	110549		Excluded
Ubiquitin conjugating enzyme 6	Ubc6	FBgn0004436	2013	23230		Excluded
Protein C kinase 98E	Pkc98E	FBgn0003093	1954	108151		Excluded
dre4	dre4	FBgn0002183	1828	106049		Excluded
bifocal	bif	FBgn0014133	1822	109722		Excluded
Protein tyrosine phosphatase 10D	Ptp10D	FBgn0004370	1817	110443		Excluded
Cystathionine beta-synthase	Cbs	FBgn0031148	1753	107325		Excluded
-	CG1640	FBgn0030478	1640	32681		Excluded
eyeless	ey	FBgn0005558	1464	106628		Excluded
Myocyte enhancer factor 2	Mef2	FBgn0011656	1429	15549		Excluded
Cullin 5	Cul5	FBgn0039632	1401	108817		Excluded
Heat shock protein 83	Hsp83	FBgn0001233	1242	7716		Excluded
Alhambra	Alh	FBgn0261238	1070	102972		Excluded
Snf5-related 1	Snr1	FBgn0011715	1064	108599		Excluded
eyeless	ey	FBgn0005558	1464	42845		Excluded
Chloride intracellular channel	Clic	FBgn0030529	10997		10997R-3	No effect
disconnected	disco	FBgn0000459	9908		JF03074	No effect
Punch	Pu	FBgn0003162	9441	107296		No effect
Lipid storage droplet-2	Lsd-2	FBgn0030608	9057		HMS01292	No effect
Lipid storage droplet-2	Lsd-2	FBgn0030608	9057		HMS00629	No effect
grainy head	grh	FBgn0259211	42311	33678		No effect
grainy head	grh	FBgn0259211	42311	33680		No effect
terribly reduced optic lobes	trol	FBgn0267911	33950	24549		No effect
nab	nab	FBgn0259986	33545	39906		No effect
Molecule interacting with CasL	Mical	FBgn0053208	33208	105837		No effect
Heparan sulfate 3-O sulfotransferase-A	Hs3st-A	FBgn0053147	33147	4998		No effect
Dpr-interacting protein alpha	DIP-alpha	FBgn0052791	32791	104044		No effect
dunce	dnc	FBgn0000479	32498	107967		No effect
-	CG32195	FBgn0052195	32195	108898		No effect
Nuclear export factor 3	Nxf3	FBgn0263232	32135	104114		No effect
-	CG44838	FBgn0266101	32043	49421		No effect
-	CG31690	FBgn0051690	31690	43813		No effect
Trissin receptor	TrissinR	FBgn0085410	31645	42758		No effect
-	CG31522	FBgn0051522	31522	106652		No effect
-	CG31475	FBgn0051475	31475	106664		No effect
INO80 complex subunit	Ino80	FBgn0086613	31212	37473		No effect
-	CG31191	FBgn0051191	31191	102425		No effect
methuselah-like 11	mthl11	FBgn0045443	31147	5968		No effect
-	CG31098	FBgn0051098	31098	21300		No effect
Guanine nucleotide exchange factor in mesoderm	GEFmeso	FBgn0050115	30115	33858		No effect
CCHamide-1 receptor	CCHa1-R	FBgn0050106	30106	1678		No effect
-	CG30022	FBgn0050022	30022	30882		No effect
Dopamine 1-like receptor 2	Dop1R2	FBgn0266137	18741	3392		No effect
Ankyrin-repeat, SH3-domain, and Proline-rich-region containing Protein	ASPP	FBgn0034606	18375	25332		No effect
midkine and pleiotrophin 2	miple2	FBgn0029002	18321	102644		No effect
Rim2 ortholog (S. cerevisiae)	Rim2	FBgn0031359	18317	100807		No effect
under-developed	udd	FBgn0033261	18316	25312		No effect
Actin 87E	Act87E	FBgn0000046	18290	102480		No effect
pleiohomeotic	pho	FBgn0002521	17743	110466		No effect
-	CG17646	FBgn0264494	17646	100378		No effect
-	CG17600	FBgn0031195	17600	102833		No effect
scabrous	sca	FBgn0003326	17579	104703		No effect
Lnk	Lnk	FBgn0028717	17367	103646		No effect
pyrexia	pyx	FBgn0035113	17142	107870		No effect
Lipase 2	Lip2	FBgn0024740	17116	31035		No effect
methuselah-like 9	mthl9	FBgn0035131	17084	2769		No effect
methuselah-like 9	mthl9	FBgn0035131	17084	2770		No effect
pointed	pnt	FBgn0003118	17077	105390		No effect
Dopamine 2-like receptor	Dop2R	FBgn0053517	17004	11470		No effect
Dopamine 2-like receptor	Dop2R	FBgn0053517	17004	11471		No effect
squid	sqd	FBgn0263396	16901	32395		No effect
viking	vkg	FBgn0016075	16858	106812		No effect
painless	pain	FBgn0060296	15860	39478		No effect
Chromatin accessibility complex 16kD protein	Chrac-16	FBgn0043001	15736	104787		No effect
ensconsin	ens	FBgn0264693	14998	106270		No effect
-	CG14971	FBgn0035449	14971	108955		No effect
ATPase 8B	ATP8B	FBgn0037989	14741	102648		No effect
lost	lost	FBgn0263594	14648	110736		No effect
Crustacean cardioactive peptide receptor	CCAP-R	FBgn0039396	14547	14767		No effect
Ionotropic receptor 54a	Ir54a	FBgn0034272	14487	2720		No effect
Ionotropic receptor 54a	Ir54a	FBgn0034272	14487	47091		No effect
-	CG14207	FBgn0031037	14207	31802		No effect
-	CG13995	FBgn0031770	13995	42525		No effect
-	CG13907	FBgn0035173	13907	107339		No effect
-	CG13895	FBgn0035158	13895	41511		No effect
-	CG13827	FBgn0039068	13827	101466		No effect
Myosuppressin receptor 2	MsR2	FBgn0264002	13803	49952		No effect
Myosuppressin receptor 2	MsR2	FBgn0264002	13803	49953		No effect
Pigment-dispersing factor receptor	Pdfr	FBgn0260753	13758	42724		No effect
Repressed by TOR	REPTOR	FBgn0039209	13624	109612		No effect
six-banded	sba	FBgn0016754	13598	101314		No effect
Odorant-binding protein 57c	Obp57c	FBgn0034509	13421	44276		No effect
Chromatin accessibility complex 14kD protein	Chrac-14	FBgn0043002	13399	39773		No effect
Chromatin accessibility complex 14kD protein	Chrac-14	FBgn0043002	13399	50778		No effect
Chromatin accessibility complex 14kD protein	Chrac-14	FBgn0043002	13399	31781		No effect
fuzzy	fy	FBgn0001084	13396	108550		No effect
taiman	tai	FBgn0041092	13109	15709		No effect
-	CG12950	FBgn0037736	12950	106353		No effect
Esa1-associated factor 6	Eaf6	FBgn0035624	12756	31761		No effect
forked end	fend	FBgn0030090	12664	110068		No effect
thisbe	ths	FBgn0033652	12443	24538		No effect
Diuretic hormone 44 receptor 2	Dh44-R2	FBgn0033744	12370	109558		No effect
SP1029	SP1029	FBgn0263236	11956	105785		No effect
Metazoan SpoT homolog-1	Mesh1	FBgn0039650	11900	108961		No effect
-	CG11873	FBgn0039633	11873	108148		No effect
seven up	svp	FBgn0003651	11502	37086		No effect
seven up	svp	FBgn0003651	11502	37087		No effect
cut	ct	FBgn0004198	11387	4138		No effect
polybromo	polybromo	FBgn0039227	11375	108618		No effect
-	CG11367	FBgn0037185	11367	103409		No effect
Adipokinetic hormone receptor	AkhR	FBgn0025595	11325	9546		No effect
Mesoderm-expressed 4	Mes4	FBgn0034726	11301	110192		No effect
twin of eyeless	toy	FBgn0019650	11186	15919		No effect
-	CG11151	FBgn0030519	11151	107530		No effect
prickle	pk	FBgn0003090	11084	101480		No effect
Retinoid- and fatty acid-binding glycoprotein	Rfabg	FBgn0087002	11064	6879		No effect
Retinoid- and fatty acid-binding glycoprotein	Rfabg	FBgn0087002	11064		HM05157	No effect
Autophagy-related 1	Atg1	FBgn0260945	10967	16133		No effect
-	CG10914	FBgn0034307	10914	108735		No effect
Corazonin receptor	CrzR	FBgn0036278	10698	44310		No effect
-	CG10639	FBgn0032729	10639	103602		No effect
Leucokinin receptor	Lkr	FBgn0035610	10626	22845		No effect
tailup	tup	FBgn0003896	10619	103585		No effect
-	CG10600	FBgn0032717	10600	31277		No effect
crossbronx	cbx	FBgn0011241	10536	101755		No effect
myoblast city	mbc	FBgn0015513	10379	16044		No effect
-	CG10365	FBgn0039109	10365	108626		No effect
spitz	spi	FBgn0005672	10334		10334R-1	No effect
-	CG10209	FBgn0033971	10209	106002		No effect
Sprouty-related protein with EVH-1 domain	Spred	FBgn0020767	10155	18025		No effect
M-spondin	mspo	FBgn0020269	10145	107608		No effect
transformer 2	tra2	FBgn0003742	10128	101548		No effect
traffic jam	tj	FBgn0000964	10034	30525		No effect
-	CG9932	FBgn0262160	9932	107846		No effect
-	CG9921	FBgn0030743	9921	110744		No effect
Rad, Gem/Kir family member 1	Rgk1	FBgn0264753	9811	30104		No effect
-	CG9743	FBgn0039756	9743	108185		No effect
frizzled 2	fz2	FBgn0016797	9739	44391		No effect
globin 1	glob1	FBgn0027657	9734	101830		No effect
domino	dom	FBgn0020306	9696	7789		No effect
real-time	retm	FBgn0031814	9528	44687		No effect
Punch	Pu	FBgn0003162	9441	105761		No effect
Calreticulin	Calr	FBgn0005585	9429	51271		No effect
short gastrulation	sog	FBgn0003463	9224	105853		No effect
vacuolar peduncle	vap	FBgn0003969	9209	107341		No effect
Gas41	Gas41	FBgn0031873	9207	106922		No effect
Pyrokinin 2 receptor 1	PK2-R1	FBgn0038140	8784	15988		No effect
Pyrokinin 2 receptor 1	PK2-R1	FBgn0038140	8784	15989		No effect
G protein beta-subunit 76C	Gbeta76C	FBgn0004623	8770	28869		No effect
Imitation SWI	Iswi	FBgn0011604	8625	6208		No effect
anachronism	ana	FBgn0011746	8084		JF02665	No effect
Tachykinin-like receptor at 99D	TkR99D	FBgn0004622	7887	1374		No effect
Actin-related protein 8	Arp8	FBgn0030877	7846	104425		No effect
Enhancer of Polycomb	E(Pc)	FBgn0000581	7776	35271		No effect
pumpless	ppl	FBgn0027945	7758	101751		No effect
Octopamine-Tyramine receptor	Oct-TyrR	FBgn0004514	7485	26876		No effect
heartless	htl	FBgn0010389	7223	6692		No effect
heartless	htl	FBgn0010389	7223	27180		No effect
-	CG7149	FBgn0031948	7149	102304		No effect
four wheel drive	fwd	FBgn0004373	7004	110159		No effect
Octopamine beta1 receptor	Octbeta1R	FBgn0038980	6919	47895		No effect
Glycogen synthase	GlyS	FBgn0266064	6904	35136		No effect
Leucine-rich-repeats and calponin homology domain protein	Lrch	FBgn0032633	6860	107047		No effect
CTP synthase	CTPsyn	FBgn0266452	6854	12762		No effect
dorsal	dl	FBgn0260632	6667	45998		No effect
dorsal	dl	FBgn0260632	6667	45996		No effect
-	CG6420	FBgn0039451	6420	110609		No effect
Cysteine string protein	Csp	FBgn0004179	6395	103201		No effect
-	CG6329	FBgn0033872	6329	104595		No effect
-	CG6325	FBgn0037814	6325	35072		No effect
-	CG6123	FBgn0030913	6123	22236		No effect
Bicoid interacting protein 1	Bin1	FBgn0024491	6046	105352		No effect
-	CG6006	FBgn0063649	6006	106513		No effect
-	CG33639	FBgn0053639	5936	29644		No effect
Dek	Dek	FBgn0026533	5935	100282		No effect
Dichaete	D	FBgn0000411	5893	49549		No effect
-	CG5681	FBgn0032658	5681	34139		No effect
basket	bsk	FBgn0000229	5680	34138		No effect
cylindromatosis ortholog (H. sapiens)	CYLD	FBgn0032210	5603	101414		No effect
Phosphoethanolamine cytidylyltransferase	Pect	FBgn0032482	5547	109802		No effect
Leucine-rich repeat kinase	Lrrk	FBgn0038816	5483	105630		No effect
p38a MAP kinase	p38a	FBgn0015765	5475	34238		No effect
Signal sequence receptor beta	SsRbeta	FBgn0011016	5474	12101		No effect
SP2637	SP2637	FBgn0034371	5473	105482		No effect
TBP-associated factor 4	Taf4	FBgn0010280	5444	109640		No effect
Phosphodiesterase 8	Pde8	FBgn0266377	5411	101413		No effect
Adiponectin receptor	AdipoR	FBgn0038984	5315		5315R-4	No effect
locomotion defects	loco	FBgn0020278	5248	110275		No effect
Glutathione S transferase E1	GstE1	FBgn0034335	5164	110529		No effect
division abnormally delayed	dally	FBgn0263930	4974	14136		No effect
Ror	Ror	FBgn0010407	4926	935		No effect
Ror	Ror	FBgn0010407	4926	932		No effect
wingless	wg	FBgn0004009	4889	13352		No effect
boule	bol	FBgn0011206	4760	101435		No effect
big brain	bib	FBgn0000180	4722	103327		No effect
hedgehog	hh	FBgn0004644	4637	1403		No effect
failed axon connections	fax	FBgn0014163	4609	103929		No effect
branchless	bnl	FBgn0014135	4608	101377		No effect
Innexin 2	Inx2	FBgn0027108	4590	102194		No effect
Thiolase	Thiolase	FBgn0025352	4581	105500		No effect
-	CG4565	FBgn0037841	4565	5665		No effect
argos	aos	FBgn0004569	4531	47180		No effect
methuselah-like 1	mthl1	FBgn0030766	4521	33136		No effect
-	CG4407	FBgn0030431	4407	105541		No effect
-	CG4393	FBgn0039075	4393	105381		No effect
hemipterous	hep	FBgn0010303	4353	109277		No effect
Major Facilitator Superfamily Transporter 10	MFS10	FBgn0030452	4330	108045		No effect
moody	moody	FBgn0025631	4322	1800		No effect
-	CG4297	FBgn0031258	4297	104552		No effect
Signal-transducer and activator of transcription protein at 92E	Stat92E	FBgn0016917	4257	43867		No effect
non-stop	not	FBgn0013717	4166	45776		No effect
-	CG4049	FBgn0034976	4049	101670		No effect
Abl tyrosine kinase	Abl	FBgn0000017	4032	110186		No effect
jumeau	jumu	FBgn0015396	4029	12610		No effect
Neurospecific receptor kinase	Nrk	FBgn0020391	4007	841		No effect
Neurospecific receptor kinase	Nrk	FBgn0020391	4007	9653		No effect
Neurospecific receptor kinase	Nrk	FBgn0020391	4007	36282		No effect
Neurospecific receptor kinase	Nrk	FBgn0020391	4007	42442		No effect
Neurospecific receptor kinase	Nrk	FBgn0020391	4007	103804		No effect
pickled eggs	pigs	FBgn0029881	3973	34772		No effect
-	CG3967	FBgn0035989	3967	106247		No effect
-	CG3860	FBgn0034951	3860	109804		No effect
-	CG3838	FBgn0032130	3838	106551		No effect
Secreted decoy of InR	Sdr	FBgn0038279	3837	44576		No effect
Secreted decoy of InR	Sdr	FBgn0038279	3837	44575		No effect
cryptochrome	cry	FBgn0025680	3772	105172		No effect
-	CG3744	FBgn0039240	3744	34695		No effect
Chromodomain-helicase-DNA-binding protein 1	Chd1	FBgn0250786	3733	103640		No effect
-	Ggamma30A	FBgn0267252	3694	26873		No effect
-	CG3625	FBgn0031245	3625	106124		No effect
-	CG3409	FBgn0033095	3409	37141		No effect
earthbound 1	ebd1	FBgn0035153	3371	26180		No effect
bigmax	bigmax	FBgn0039509	3350	110630		No effect
Kruppel	Kr	FBgn0001325	3340	104150		No effect
Brahma associated protein 170kD	Bap170	FBgn0042085	3274	34581		No effect
-	CG3168	FBgn0029896	3168	48010		No effect
Synaptotagmin 1	Syt1	FBgn0004242	3139	100608		No effect
Allatostatin A receptor 1	AstA-R1	FBgn0266429	2872	48495		No effect
-	CG2211	FBgn0035211	2211	100510		No effect
FMRFamide Receptor	FMRFaR	FBgn0035385	2114	9594		No effect
-	CG2064	FBgn0033205	2064	103276		No effect
hikaru genki	hig	FBgn0010114	2040	109863		No effect
Rho GTPase activating protein at 100F	RhoGAP100F	FBgn0039883	1976	106241		No effect
ATP-dependent chromatin assembly factor large subunit	Acf	FBgn0027620	1966	33446		No effect
sprouty	sty	FBgn0014388	1921	6948		No effect
Rab40	Rab40	FBgn0030391	1900	110563		No effect
Ady43A	Ady43A	FBgn0026602	1851	33133		No effect
-	Br140	FBgn0033155	1845	101311		No effect
Phosphorylase kinase gamma	PhKgamma	FBgn0011754	1830	110638		No effect
BTB (POZ) domain containing 9 ortholog	BTBD9	FBgn0030228	1826	110685		No effect
Histone deacetylase 4	HDAC4	FBgn0041210	1770	20522		No effect
Ras oncogene at 64B	Ras64B	FBgn0003206	1167	6225		No effect
Glucose transporter 1	Glut1	FBgn0264574	1086	13326		No effect
KCNQ potassium channel	KCNQ	FBgn0033494	33135	106655		No effect
LDL receptor protein 1	LRP1	FBgn0053087	33087	109605		No effect
Secretory Pathway Calcium atpase	SPoCk	FBgn0052451	32451	110379		No effect
-	CG30389	FBgn0050389	30389	101553		No effect
sprite	sprt	FBgn0082585	30023	107873		No effect
Lk6 kinase	Lk6	FBgn0017581	17342	109663		No effect
Homeodomain interacting protein kinase	Hipk	FBgn0035142	17090	108254		No effect
-	CG17027	FBgn0036553	17027	103270		No effect
jim lovell	lov	FBgn0266129	16778	10739		No effect
subdued	subdued	FBgn0038721	16718	108953		No effect
Ceramide kinase	Cerk	FBgn0037315	16708	101550		No effect
-	CG16700	FBgn0030816	16700	110058		No effect
-	CG15894	FBgn0029864	15894	103818		No effect
Juvenile hormone epoxide hydrolase 2	Jheh2	FBgn0034405	15102	30909		No effect
Juvenile hormone epoxide hydrolase 1	Jheh1	FBgn0010053	15101	103249		No effect
-	CG15027	FBgn0030611	15027	110436		No effect
Glutamic acid decarboxylase 1	Gad1	FBgn0004516	14994	32344		No effect
-	CG14946	FBgn0032405	14946	106023		No effect
-	CG13654	FBgn0039290	13654	110349		No effect
-	CG12730	FBgn0029771	12730	109016		No effect
Shaker	Sh	FBgn0003380	12348	104474		No effect
Mob2	Mob2	FBgn0259481	11711	107327		No effect
-	CG11593	FBgn0035488	11593	108869		No effect
-	Lim1	FBgn0026411	11354	104468		No effect
fussel	fuss	FBgn0039932	11093	103367		No effect
mirror	mirr	FBgn0014343	10601	50134		No effect
chickadee	chic	FBgn0000308	9553	102759		No effect
king tubby	ktub	FBgn0015721	9398	29110		No effect
Sterol regulatory element binding protein	SREBP	FBgn0261283	8522	37641		No effect
-	CG8389	FBgn0034063	8389	107639		No effect
-	CG7739	FBgn0036509	7739	51521		No effect
Src oncogene at 64B	Src64B	FBgn0262733	7524	35252		No effect
-	CG7341	FBgn0036777	7341	109019		No effect
Pyruvate kinase	PyK	FBgn0267385	7070	49533		No effect
outspread	osp	FBgn0003016	3479	110701		No effect
castor	cas	FBgn0004878	2102	2928		No effect
Protein kinase N	Pkn	FBgn0020621	2049	108870		No effect
-	CG1882	FBgn0033226	1882	41405		No effect
Hormone receptor-like in 38	Hr38	FBgn0014859	1864	2971		No effect
discs large 1	dlg1	FBgn0001624	1725	109274		No effect
temperature-induced paralytic E	tipE	FBgn0003710	1232	4483		No effect
Daughters against dpp	Dad	FBgn0020493	5201	110644		No effect
-	CG31301	FBgn0051301	31301	104460		Suppressor	N
-	CG31125	FBgn0051125	31125	25700		Suppressor	N
Hormone receptor-like in 39	Hr39	FBgn0261239	8676		8676R-3	Suppressor	N
RYamide receptor	RYa-R	FBgn0004842	5811	1259		Suppressor	Opposite
INO80 complex subunit	Ino80	FBgn0086613	31212	106684		Suppressor	Y
Chromatin accessibility complex 14kD protein	Chrac-14	FBgn0043002	13399	31782		Suppressor	Y
Inhibitor of growth family, member 3	Ing3	FBgn0030945	6632	109799		Suppressor	Y
anterior open	aop (yan)	FBgn0000097	3166		3166R-1	Suppressor	Y
Metastasis associated 1-like	MTA1-like	FBgn0027951	2244	110632		Suppressor	Y
